# Supplementary material for: Numerical simulation of nitrous oxide over Asia using regional climate-chemistry-ecology coupling model RegCM-Chem-YIBs
Source: Copernicus journal article supplement (doi:10.5194/egusphere-2025-608), 2025-03-25
Supplement: Supplementary file [file egusphere-2025-608-AC2-supplement.pdf]

## Xin Zeng et al.

**RC2: 'Comment on egusphere-2025-608', Anonymous Referee #2, 03 Jul 2025**

**Original comment 1#:** The Introduction is not well developed and lacks a clear connection between the identified research gap and the specific research question addressed in this study. The motivation remains weak and unconvincing, and some background statements appear generic or only loosely related to the core topic of N<sub>2</sub>O modeling (see specific comments below).

**Response:** We appreciate the reviewer’s constructive feedback. We fully agree that the original introduction did not adequately articulate the link between the broader research gap and the specific scientific question addressed in this study. In response, we have substantially revised the Introduction to improve its clarity, focus, and logical progression.

We now begin by emphasizing the dual climate and ozone-depleting role of  $\text{N}_2\text{O}$ , establishing its relevance and urgency. We have removed general policy-related statements that were not directly aligned with the scientific focus of the paper. Through the literature, we found that a key gap in current modeling approaches: many frameworks treat the atmosphere as a passive boundary without explicitly simulating key atmospheric processes such as transport, mixing,





this combined format may reduce clarity and analysis depth. In the revised original draft, we reorganized the content and split the original "Results and Discussion" section into two separate parts:

Section 3: Results. Now we focus on the presentation of model output, key results and comparative analysis. Section 3 is divided into four subsections, namely emission inventory differences and their impacts on modeled  $\text{N}_2\text{O}$ , model evaluation, spatiotemporal distribution of  $\text{N}_2\text{O}$ , and seasonality of ground  $\text{N}_2\text{O}$  concentrations.

Section 4: Discussion. We provided a more focused interpretation of the research results, evaluated the limitations of the model and experimental design, and delved into the reasons for the differences in the simulation effects of the two sets of lists. We analyzed the potential factors for the inconsistency between the site observations and the simulation results, as well as the uncertainties of this study, the shortcomings of the existing model, and the future development goals.

This reorganization enhances the readability of the manuscript and provides a clearer space for evaluating the robustness of our findings and placing them in a broader scientific context. We are grateful to the reviewers for their guidance, which has helped us enhance the clarity and organization of our manuscripts.

**Original comment 4#:** The main discussion section primarily highlights the agreement between the simulation results and previous studies, but it lacks a critical assessment of discrepancies or differences. A balanced discussion should also address where and why the model diverges from other findings, which is essential for understanding model behavior and performance in the future studies. Moreover, there is no discussion of model limitations. For a study published in a model development journal, it is important to transparently acknowledge the assumptions, uncertainties, and potential weaknesses in the model framework or input data.

**Response:** We thank the reviewer for this insightful comment. We agree that the original discussion lacked sufficient depth in analyzing discrepancies and explicitly acknowledging model limitations.

We have divided the "results and discussions" in the original manuscript into two separate sections. In the discussion section, we analyzed and compared the differences between the two inventories and the reasons for the similarities and differences between their simulation results and the observed and reanalyzed data. One reason is the limitation of model structure. The current model framework does not include the stratospheric photochemical loss processes of  $\text{N}_2\text{O}$ , which are implicitly accounted for in the CAMS reanalysis dataset through data assimilation. This omission leads to excessive accumulation of  $\text{N}_2\text{O}$  in regions influenced by stratosphere-troposphere exchange, causing an overestimation in CAMS-driven simulations. Another reason is the methodological differences in inventories. EDGAR is a bottom-up inventory based on activity data and emission factors, offering sectoral detail and emission-only signals but lacking temporal variability. CAMS, in contrast, is a top-down inversion constrained by observations. Its inversion process may conflate transport errors with emission estimates, introducing internal inconsistencies. Given our goal of isolating the role of emissions from transport, EDGAR provides a more suitable and interpretable signal for this modeling framework.

Then we discussed the reasons why the model of this study failed to reproduce the peak  $\text{N}_2\text{O}$  concentrations at the AMY, GSN and TAP sites in June. This deficiency is primarily attributed to the omission of key stratospheric processes, namely the chemical sink of  $\text{N}_2\text{O}$  and the stratosphere-troposphere exchange (STE). We also analyzed why the CAMS-driven simulations consistently produced higher  $\text{N}_2\text{O}$  concentrations than those driven by EDGAR at sites such as TAP, UUM, and WLG. We conducted a correlation analysis between the  $\text{N}_2\text{O}$  concentration simulated by the model and surface emissions. The results exhibited that within the study region, emission distribution is one of the primary drivers of the spatial variability in surface  $\text{N}_2\text{O}$  concentrations. The correlation between the CAMS emissions and the simulated concentration is higher ( $R^2 = 0.84$ ,  $p < 0.01$ ), while the correlation for EDGAR is slightly lower ( $R^2 = 0.46$ ,  $p < 0.01$ ). Compared with EDGAR, the emission intensity of these sites reported by the CAMS inventory is higher, which largely explains the reason for the increase in simulated concentrations.

In addition, the reasons why the regional average surface nitrous oxide concentration simulated



mitigation strategies, as these topics go beyond the scope of this study. We also revised the abstract and introduction to more accurately reflect the study objectives, emphasizing that this work serves as a necessary first step toward understanding the inventory driven uncertainties in N<sub>2</sub>O simulations, prior to investigating interaction mechanisms or designing mitigation strategies. In addition, we explicitly clarified the study's scope in the introduction to avoid confusion about the intended contributions of the paper. We have made modifications to abstract in the revised manuscript (Lines 29-32, 118-124) to help readers better understand this work.

**Revised version:**

[illegible]

Revisions to the introduction section (L118-124): Our objectives are to assess the spatial and seasonal variability of simulated N<sub>2</sub>O concentrations over East, South, and Southeast Asia in 2020, evaluate the sensitivity of model outputs to the choice of inventory and explore the driving factors influencing the seasonal concentration of nitrous oxide. Unlike many process-based studies focusing on terrestrial emissions, our approach decouples surface flux generation from atmospheric redistribution, thereby enabling a clearer assessment of how inventory choices affect modeled N<sub>2</sub>O distributions. This work serves as an initial step toward the inclusion of N<sub>2</sub>O in regional climate-chemistry modeling systems, with implications for understanding the atmospheric transport of N<sub>2</sub>O in high-emission regions. It also provides a framework that can be extended in future studies to incorporate biogenic fluxes and feedbacks with land surface processes.

**Original comment 2#:** L34-46: This section largely repeats the content of Lines 23-30 and reads more like a general background summary rather than a focused introduction to N<sub>2</sub>O-specific modeling. Much of the text is common knowledge for the intended audience and does

not add meaningful context to the study. I recommend the authors revise this part to be more concise and directly aligned with the scientific objectives of the paper. Avoid generic statements and instead focus on the specific research gap, methodological innovation, or model improvement being addressed. Redundant wording should be removed to improve clarity and relevance.

**Response:** Thank you for this valuable comment. We agree that the original paragraph contained overly general background information and did not clearly articulate the relevance to N<sub>2</sub>O-specific modeling. In response, we have revised the first paragraph of the introduction to make it more concise and better aligned with the scientific focus of the study. The revised version (Lines 46-50) first briefly highlights the significance of N<sub>2</sub>O and then transitions into the key knowledge gaps in its vertical and regional distributions, as well as the modeling challenges that motivate our work. We have also removed repetitive or generic statements to enhance clarity and relevance.

**Revised version:** Nitrous oxide (N<sub>2</sub>O) ranks as the third most prevalent greenhouse gas in the atmosphere, following carbon dioxide (CO<sub>2</sub>) and methane (CH<sub>4</sub>). With a global warming potential 273 times that of CO<sub>2</sub> and an atmospheric lifetime of 116 ± 9 years (Prather et al., 2015), N<sub>2</sub>O contributes approximately 6% to the radiative forcing from long-lived greenhouse gases (WMO, 2023; NOAA, 2024). By 2022, the global average concentration of N<sub>2</sub>O had reached 335.8 ± 0.1 parts per billion (ppb), reflecting a 124% increase since the pre-industrial era. As a result, N<sub>2</sub>O has become the largest contributor to the growth in effective radiative forcing among long-lived greenhouse gases since 1990 (WMO, 2023). In addition to its role as a potent greenhouse gas, N<sub>2</sub>O is also a significant ozone-depleting substance (ODS). In the stratosphere, it undergoes photolysis to produce reactive nitrogen species (NO<sub>x</sub>), which catalyze ozone destruction (UNEP, 2013; McElroy and McConnell, 1971). In 2020, anthropogenic N<sub>2</sub>O emissions, expressed in terms of CFC-11 equivalents, exceeded those of all CFCs by more than twofold, representing over 20% of the peak CFC emissions recorded in 1987 (Geneva, 2022). As such, N<sub>2</sub>O is expected to remain the dominant ODS throughout the 21st century (Ravishankara et al., 2009). **Despite its growing atmospheric burden, N<sub>2</sub>O has received comparatively less attention than CO<sub>2</sub> and CH<sub>4</sub> in both observational and modeling**



communities. In particular, there is still a lack of clarity regarding its spatial and temporal distribution in the free troposphere and lower stratosphere, as well as the relative importance of emission patterns and atmospheric transport in shaping these distributions.

**Original comment 3#:** L57: Stange et al. (2000) is not the original publication describing the N<sub>2</sub>O development within the DNDC model. It would be great to refer to the original foundational work by Li et al. (1992; JGR), which first introduced the N<sub>2</sub>O modeling framework in DNDC.

**Response:** Thank you for your valuable suggestion. We agree that Stange et al. (2000) is not the original reference for the development of the N<sub>2</sub>O component in the DNDC model. Accordingly, we have replaced this citation with the foundational work by Li et al. (1992), which originally introduced the N<sub>2</sub>O simulation framework in DNDC.

**Revised version:** Li, C., Frolking, S., and Frolking, T. A.: A model of nitrous oxide evolution from soil driven by rainfall events: 1. Model structure and sensitivity, *Journal of Geophysical Research: Atmospheres*, 97, 9759-9776, 10.1029/92jd00509, 1992.

**Original comment 4#:** L56-59: The citation of process-based N<sub>2</sub>O modeling studies appears outdated. At a minimum, the authors should acknowledge the development and application of dynamic global vegetation models (DGVMs), such as O-CN, CLM, TRIPLEX, ORCHIDEE, LPJ-GUESS, CABLE, and DLEM, which have been widely used to estimate the global N<sub>2</sub>O budget, as discussed in Tian et al. (2020). Furthermore, other key approaches, such as the IPCC-recommended emission factor (EF)-based method and atmospheric inversion modeling, are also essential tools for estimating N<sub>2</sub>O emissions at regional and global scales. These approaches should be mentioned to provide a more comprehensive and up-to-date overview of current methodologies in the field.

**Response:** Thank you for this insightful comment. We agree that our initial review of process-based N<sub>2</sub>O models was incomplete and did not adequately reflect recent developments in the

field. In response, we have substantially revised this section of the manuscript (Lines 51–70) to provide a more comprehensive and up-to-date overview of current modeling approaches used to estimate N<sub>2</sub>O emissions at regional and global scales. Specifically, we now highlight the growing role of dynamic global vegetation models (DGVMs) such as O-CN, CLM, TRIPLEX-GHG, IBIS, LPJ-GUESS, which integrate biogeochemical and climate feedbacks and are increasingly used for large-scale N<sub>2</sub>O budget assessments. We also include mention of the IPCC-recommended emission factor (EF)-based approaches and atmospheric inversion methods, both of which have been widely adopted for independent constraints on N<sub>2</sub>O source estimates.

To better structure this part, we organize the tools into four categories: (1) site-specific models like DNDC (Li et al., 1992) and DAYCENT (Parton et al., 1996), (2) dynamic global vegetation models (DGVMs; Cramer et al., 2001) like ORCHIDEE (Krinner et al., 2005), O-CN (Zaehle and Friend, 2010), CLM (Saikawa et al., 2013), TRIPLEX-GHG (Zhang et al., 2017), IBIS (Ma et al., 2022) and LPJ-GUESS (Ma et al., 2025) (3) EF-based bottom-up approaches, and (4) top-down atmospheric inversion techniques. We further emphasize a key limitation shared by most of these models: they treat the atmosphere either diagnostically or as a boundary layer, lacking explicit simulation of transport, mixing, and vertical redistribution processes that are essential for understanding atmospheric N<sub>2</sub>O variability. This limitation provides the motivation for our study, which integrates emission processes with atmospheric transport modeling in a unified framework.

**Revised version:** As a greenhouse gas of significant global concern, accurately simulating the emission and concentration distribution of N<sub>2</sub>O is essential for assessing the impacts of climate change and crafting effective emission reduction strategies (De Sisto et al., 2024; Zhou et al., 2020). From the site-specific models such as DNDC (Li et al., 1992), DAYCENT (Parton et al., 1996) to the dynamic global vegetation models (DGVMs; Cramer et al., 2001) like ORCHIDEE (Krinner et al., 2005), O-CN (Zaehle and Friend, 2010), CLM (Saikawa et al., 2013), TRIPLEX-GHG (Zhang et al., 2017), IBIS (Ma et al., 2022) and LPJ-GUESS (Ma et al., 2025), the detailed process of nitrous oxide generation is added to the global model, allowing N<sub>2</sub>O emissions to be truly coupled to climate, carbon cycle, water cycle, and human activities, so

that their source-sink changes and climate feedbacks can be assessed at a global scale. In addition to process-based modeling, other commonly employed approaches include the emission factor (EF) method recommended by the IPCC (IPCC, 2019), which estimates emissions from agricultural and industrial activities based on nitrogen input and empirically derived coefficients. This method remains widely used in national greenhouse gas inventories. Atmospheric inverse modeling represents another major technique, using top-down constraints from ground-based or satellite observations to optimize emission estimates (Fischer, 2015; Patra et al., 2022; Stell et al., 2022). Together, these bottom-up and top-down methods have greatly contributed to global N<sub>2</sub>O budget assessments. However, most of these modeling frameworks treat the atmosphere as a boundary or diagnostic layer, lacking an explicit simulation of key atmospheric processes such as transport, mixing, and vertical accumulation. Given its long atmospheric lifetime (Prather et al., 2015), inter-hemispheric gradients, and sensitivity to large-scale circulation, explicitly modeling N<sub>2</sub>O transport is crucial for accurate concentration assessments.

**Original comment 5#:** L78-85: The manuscript repeatedly emphasizes the importance of mitigating N<sub>2</sub>O emissions and protecting the ozone layer. However, it is unclear whether this study directly addresses these broader issues in a meaningful or actionable way. If not, I recommend the authors avoid overusing such generic and broad statements. Instead, the focus should be on clearly articulating the specific research question being addressed and ensuring that the motivation aligns with the actual scope and objectives of the study. As it stands, the current presentation of the research motivation is not sufficiently compelling or focused.

**Response:** We thank the reviewer for this valuable feedback. We acknowledge that our original manuscript contained some broad statements emphasizing the importance of reducing N<sub>2</sub>O emissions and protecting the ozone layer, which were not sufficiently linked to the specific scope and objectives of our study. In response, we have carefully revised the introduction and abstract sections to focus more precisely on the concrete research questions addressed by this work. Specifically, we now clearly articulate our main objectives: evaluating how different N<sub>2</sub>O inventories influence simulated atmospheric concentrations within a consistent regional

transport framework, and investigating the seasonal variations and driving factors of surface N<sub>2</sub>O concentrations at selected observation sites in East Asia. By doing so, we have removed overly general claims and strengthened the research motivation to better reflect the actual contributions and limitations of our study.

**Original comment 6#:** L86-95: I believe it is necessary to include a paragraph summarizing the progress made by other regional climate-chemistry-ecosystem models (or similar modeling frameworks) regarding N<sub>2</sub>O-related process development. This contextual background is important for readers to understand the advances achieved in previous studies and how the current work fits into or improves upon them. Additionally, is there a specific reason why 2020 was selected as the only study year?

**Response:** We appreciate the reviewer's insightful suggestion. We agree that providing such context is important for readers to understand prior advances and how our current work fits within or improves upon existing efforts. Accordingly, we have added a dedicated paragraph in the introduction that highlights key developments in three-dimensional global atmospheric chemical transport models (CTMs) which assess the impact of surface emissions and atmospheric transport on tropospheric nitrous oxide (N<sub>2</sub>O) concentrations. The relevant revisions can be found in Lines 71-89.

Regarding the choice of the year 2020 for our simulation, we selected this year primarily because it is the most recent year with comprehensive and consistent emission inventories (CAMS, EDGAR) and available ground-based N<sub>2</sub>O observations for model evaluation. Additionally, 2020 serves as a representative recent climatological year, enabling us to assess model performance under contemporary conditions.

**Revised version:** To assess the impact of surface emissions and atmospheric transport on tropospheric nitrous oxide (N<sub>2</sub>O) concentrations, researchers have developed multiple three-dimensional global atmospheric chemical transport models (CTMs). Within the TransCom-N<sub>2</sub>O project framework, models from multiple institutions differ in spatial resolution, vertical layering, meteorological forcing, and emission treatment, and have been widely employed to

investigate the spatiotemporal distribution and transport mechanisms of N<sub>2</sub>O (Thompson et al., 2014). The simulation based on GEOSCCM reconstructed the N<sub>2</sub>O concentration and its isotope fluxes from 1980 to 2019, thereby revealing the contribution of anthropogenic emissions (Liang et al., 2022). Lickley et al. (2021) quantified the stratospheric influence on surface hemispheric differences in models and observations for N<sub>2</sub>O. In addition, the influence of the Brewer-Dobson circulation on the transport and budget of N<sub>2</sub>O in the stratosphere has also attracted attention (Minganti et al., 2022). Despite these advances, CTMs face persistent challenges. Most operate at relatively coarse spatial resolution (Chipperfield, 2006), limiting their ability to resolve regional and seasonal variations. Some models run in offline mode (Ishijima et al., 2010; Martin Heimann, 2003), relying on fixed meteorological inputs and thus unable to capture feedbacks between transport processes and emission changes. Furthermore, critical mechanisms such as stratospheric chemical reactions and stratosphere-troposphere exchange (STE) are often simplified or omitted. Therefore, enhancing the physical process characterization ability and spatial resolution of the model, as well as strengthening the coupling with observational data, are the key directions for future simulation of the evolution of N<sub>2</sub>O concentration.

**Original comment 7#:** L117-122: The ecological module (e.g., YIBs) should include a clear description of how other nitrogen-related dynamic processes, such as biological nitrogen fixation, wet/dry deposition, plant uptake, and hydrological N loss, are represented, especially in relation to N<sub>2</sub>O production and loss. Without this level of process-level documentation, readers and future users cannot assess, reproduce, or compare the model implementation, which is a key requirement of GMD.

**Response:** We appreciate the reviewer's insightful comment. The current study employs the RegCM-Chem-YIBs model primarily due to its high spatial resolution and its capacity to simulate the interactions among air pollutants, greenhouse gases, and regional climate. In our implementation, we focus on the inclusion of nitrous oxide as a tropospheric inert greenhouse gas, similar to CO<sub>2</sub>, which involves externally prescribed emissions and internally simulated atmospheric transport. The model does not contain the internal nitrous oxide source-sink





**Revised version:** The simulation period spans the full calendar year of 2020 and no spin-up was applied due to the lack of internal sources and sinks of N<sub>2</sub>O in the model. Because N<sub>2</sub>O has a long atmospheric lifetime and is treated as chemically inert in this setup, the model was initialized with CAMS reanalysis N<sub>2</sub>O concentration dataset. The short-term initialization is sufficient to capture concentration responses to prescribed surface fluxes and atmospheric transport.

Two parallel simulation experiments were conducted, differing only in the N<sub>2</sub>O inventory used as surface forcing:

CAMS Case: Using the CAMS inversion-optimized N<sub>2</sub>O fluxes.

EDGAR Case: Using the bottom-up EDGAR anthropogenic N<sub>2</sub>O emissions.

The physical and chemical processes in the model are configured using a combination of widely validated parameterization schemes. Gas-phase chemistry is represented by the CBM-Z mechanism (Zaveri and Peters, 1999), while planetary boundary layer processes are modeled using the Holtslag scheme (Holtslag et al., 1990). Convection is simulated with the Grell cumulus parameterization (Grell, 1993), and land-atmosphere interactions are resolved using the CLM4.5 land surface model (Oleson et al., 2008; Stöckli et al., 2008). Radiative processes follow the CCM3 radiation scheme (Zhang et al., 1998; Giorgi et al., 2012). These configurations are consistent with prior studies employing RegCM-Chem-YIBs in East Asia (Xie et al., 2019; Ma et al., 2023). All other boundary conditions, physical parameterizations, and model configurations were held constant between the two runs, ensuring that differences in simulated N<sub>2</sub>O distributions resulted solely to differences in the inventories. Inner natural N<sub>2</sub>O sources from soils and oceans were excluded, enabling a targeted investigation of input anthropogenic signals.

**Original comment 9#:** L203-207: I believe this part belongs to “Methodology” section.

**Response:** We agree with you. We remove this part from the section3.1.

Besides, we added a new section2.5 named “Extraction of Seasonal Signals in Surface N<sub>2</sub>O









concentrations simulated by EDGAR are typically 1-5 ppb higher than those of CAMS. The July results of the two inventories showed a very high degree of consistency. However, in the January simulation, compared to EDGAR-driven results, CAMS slightly overestimates concentrations in northwest China but underestimates concentrations in high-emission areas near eastern China and the Ganges River Basin in India. As shown in Fig. S2, during spring and summer when surface N<sub>2</sub>O concentrations are low, the model performs very well, with no obvious overestimation or underestimation. However, during autumn and winter, when the concentrations of nitrous oxide are relatively high, the results of CAMS input data overestimates high-emission areas in autumn and underestimates them in winter. The spatial distributions of annual high-emission areas in autumn and winter obtained from EDGAR input data are largely consistent but underestimated compared to the reanalysis data.

**Original comment 11#:** L270-281: The presentation of the site-level comparison results is overly descriptive and lacks in-depth analysis. I recommend the authors focus more on the discrepancies in seasonality between simulations and observations, which would be more interesting for readers. For instance, why does the model fail to reproduce the N<sub>2</sub>O peak in June at sites such as AMY, GSN, and TAP? Additionally, what causes the simulated N<sub>2</sub>O concentrations driven by CAMS to be consistently higher than those driven by EDGAR at TAP, UUM, and WLG?

**Response:** We appreciate the reviewer's suggestion and agree that more comprehensive analysis of the seasonal discrepancies between simulations and observations would improve the manuscript. Accordingly, we have revised the structure of the manuscript by splitting the original Section 3 "Results and Discussion" into two separate sections: section 3 "Results" and section 4 "Discussion".

In the "Discussion" section, we explored in detail the possible reasons why the model failed to capture the June N<sub>2</sub>O peak at AMY, GSN, and TAP. This deficiency is primarily attributed to the omission of key stratospheric processes, namely the chemical sink of N<sub>2</sub>O and the stratosphere-troposphere exchange (STE).



According to our correlation analysis between observed N<sub>2</sub>O concentrations and surface emissions, surface flux remains an important driver of variability (Tian et al., 2020). As shown in Fig. 2b, the CAMS inventory reports higher emission intensities at these sites compared to EDGAR, which largely explains the elevated simulated concentrations. These findings are in line with previous work demonstrating that uncertainties in emission inventories can significantly influence modeled N<sub>2</sub>O concentrations (Saikawa et al., 2014; Thompson et al., 2019).

It is worth noting that although individual sites such as AMY, GSN, and TAP exhibit a summer-high and winter-low concentration pattern, the regional average over East Asia shows the opposite trend that lower N<sub>2</sub>O concentrations in summer and higher in winter. This apparent contradiction can be explained by the following three mechanisms: Seasonal variation in the height of the atmospheric boundary layer: In summer, the height of the boundary layer in East Asia deepens considerably, diluting near-surface N<sub>2</sub>O and lowering the regional average concentration. In contrast, a shallow winter boundary layer facilitates pollutant accumulation, resulting in higher concentrations (Jaffe et al., 1999). Regional differentiated transport effects: Background or high-altitude sites are less affected by direct anthropogenic emissions. In contrast, the regional average includes more urban and lowland areas where N<sub>2</sub>O accumulation is enhanced in winter due to stagnant meteorological conditions and regional transport (Thompson et al., 2014). The STE process of nitrous oxide is enhanced during convection-active summers, and stratospheric air transport to the surface may dilute surface N<sub>2</sub>O concentrations but have a certain hysteresis effect, and low values of nitrous oxide may be observed at the surface in late summer (Ruiz and Prather, 2022). Since the stratospheric nitrous oxide sink and STE processes are not added to the model, the model does not reflect this stratospheric contribution, resulting in different patterns. However, the actual effect at specific sites depends on the strength and vertical extent of mixing (Nevison et al., 2004).

**Original comment 12#:** L309-310 & L336-338: This sentence is repetitive and does not add new information, consider removing it.

Response: Thank you for comment. We removed L336-338 from the original version.

---

---

**All the revisions have been incorporated into the revised manuscript, and we hope that the updated version now meets the requirements of the journal. We sincerely appreciate the reviewer's thoughtful comments and efforts, and we respectfully invite a re-evaluation of the manuscript.**

The following are the newly added references:

- Chipperfield, M. P.: New version of the TOMCAT/SLIMCAT off-line chemical transport model: Intercomparison of stratospheric tracer experiments, *Quarterly Journal of the Royal Meteorological Society*, 132, 1179-1203, 10.1256/qj.05.51, 2006.
- Cramer, W., Bondeau, A., Woodward, F. I., Prentice, I. C., Betts, R. A., Brovkin, V., Cox, P. M., Fisher, V., Foley, J. A., Friend, A. D., Kucharik, C., Lomas, M. R., Ramankutty, N., Sitch, S., Smith, B., White, A., and Young Molling, C.: Global response of terrestrial ecosystem structure and function to CO<sub>2</sub> and climate change: results from six dynamic global vegetation models, *Global Change Biology*, 7, 357-373, 10.1046/j.1365-2486.2001.00383.x, 2001.
- Fischer, M., Jeong, S., Newman, S., & Zhang, J.: Atmospheric Measurement and Inverse Modeling to Improve Greenhouse Gas Emission Estimates, Lawrence Berkeley National Laboratory. LBNL Report #: LBNL-1006298. Retrieved from <https://escholarship.org/uc/item/13v6h0f7>, 2015.
- Han, Z., Sakurai, T., Ueda, H., Carmichael, G., Streets, D., Hayami, H., Wang, Z., Holloway, T., Engardt, M., and Hozumi, Y.: MICS-Asia II: Model intercomparison and evaluation of ozone and relevant species, *Atmospheric Environment*, 42, 3491-3509, 10.1016/j.atmosenv.2007.07.031, 2008.
- Hong, C., Zhang, Q., He, K., Guan, D., Li, M., Liu, F., and Zheng, B.: Variations of China's emission estimates: response to uncertainties in energy statistics, *Atmospheric Chemistry and Physics*, 17, 1227-1239, 10.5194/acp-17-1227-2017, 2017.
- IPCC. 2019 Refinement to the 2006 IPCC Guidelines for National Greenhouse Gas Inventories. Hyama: Institute for Global Environmental Strategies, 2019.
- Ishijima, K., Patra, P. K., Takigawa, M., Machida, T., Matsueda, H., Sawa, Y., Steele, L. P., Krummel, P. B., Langenfelds, R. L., Aoki, S., and Nakazawa, T.: Stratospheric influence on the seasonal cycle of nitrous oxide in the troposphere as deduced from aircraft observations and model simulations, *Journal of Geophysical Research: Atmospheres*, 115, 10.1029/2009jd013322, 2010.
- Jaffe, D., Anderson, T., Covert, D., Kotchenruther, R., Trost, B., Danielson, J., Simpson, W., Berntsen, T., Karlsdottir, S., Blake, D., Harris, J., Carmichael, G., and Uno, I.: Transport of Asian air pollution to North America, *Geophysical Research Letters*, 26, 711-714, 10.1029/1999gl900100, 1999.
- Jiang, X., Ku, W. L., Shia, R. L., Li, Q., Elkins, J. W., Prinn, R. G., and Yung, Y. L.: Seasonal cycle of N<sub>2</sub>O: Analysis of data, *Global Biogeochemical Cycles*, 21, 10.1029/2006gb002691, 2007.
- Krinner, G., Viovy, N., de Noblet-Ducoudré, N., Ogée, J., Polcher, J., Friedlingstein, P., Ciais, P., Sitch,





- A. L.: Modelling the growth of atmospheric nitrous oxide using a global hierarchical inversion, *Atmospheric Chemistry and Physics*, 22, 12945-12960, 10.5194/acp-22-12945-2022, 2022.
- Thompson, R. L., Bousquet, P., Chevallier, F., Rayner, P. J., and Ciais, P.: Impact of the atmospheric sink and vertical mixing on nitrous oxide fluxes estimated using inversion methods, *Journal of Geophysical Research*, 116, 10.1029/2011jd015815, 2011.
- Thompson, R. L., Lassaletta, L., Patra, P. K., Wilson, C., Wells, K. C., Gressent, A., Koffi, E. N., Chipperfield, M. P., Winiwarter, W., Davidson, E. A., Tian, H., and Canadell, J. G.: Acceleration of global N<sub>2</sub>O emissions seen from two decades of atmospheric inversion, *Nature Climate Change*, 9, 993-998, 10.1038/s41558-019-0613-7, 2019.
- Thompson, R. L., Dlugokencky, E., Chevallier, F., Ciais, P., Dutton, G., Elkins, J. W., Langenfelds, R. L., Prinn, R. G., Weiss, R. F., Tohjima, Y., O'Doherty, S., Krummel, P. B., Fraser, P., and Steele, L. P.: Interannual variability in tropospheric nitrous oxide, *Geophysical Research Letters*, 40, 4426-4431, 10.1002/grl.50721, 2013.
- Thompson, R. L., Patra, P. K., Ishijima, K., Saikawa, E., Corazza, M., Karstens, U., Wilson, C., Bergamaschi, P., Dlugokencky, E., Sweeney, C., Prinn, R. G., Weiss, R. F., O'Doherty, S., Fraser, P. J., Steele, L. P., Krummel, P. B., Saunio, M., Chipperfield, M., and Bousquet, P.: TransCom N<sub>2</sub>O model inter-comparison-Part 1: Assessing the influence of transport and surface fluxes on tropospheric N<sub>2</sub>O variability, *Atmospheric Chemistry and Physics*, 14, 4349-4368, 10.5194/acp-14-4349-2014, 2014.
- Yuan, W., Liang, M., Gao, Y., Huang, L., Dan, L., Duan, H., Hong, S., Jiang, F., Ju, W., Li, T., Lou, Z., Luan, S., Lu, X., Qin, Z., Ran, L., Shen, L., Teng, F., Tian, X., Wang, Y., Wei, J., Xia, J., Xia, X., Yu, L., Yue, X., Zhang, H., Zhang, W., Zhang, Y., Zhao, X., Zhu, Q., Piao, S., and Wang, X.: China's greenhouse gas budget during 2000-2023, *Natl Sci Rev*, 12, nwaf069, 10.1093/nsr/nwaf069, 2025.
- Zaehle, S. and Friend, A. D.: Carbon and nitrogen cycle dynamics in the O-CN land surface model: 1. Model description, site-scale evaluation, and sensitivity to parameter estimates, *Global Biogeochemical Cycles*, 24, 10.1029/2009gb003521, 2010.
- Zhang, K., Peng, C., Wang, M., Zhou, X., Li, M., Wang, K., Ding, J., and Zhu, Q.: Process-based TRIPLEX-GHG model for simulating N<sub>2</sub>O emissions from global forests and grasslands: Model development and evaluation, *Journal of Advances in Modeling Earth Systems*, 9, 2079-2102, 10.1002/2017ms000934, 2017.
